# Supplementary material for: Sulfonated polyaniline-encapsulated graphene@graphitic carbon nitride nanocomposites for significantly enhanced photocatalytic degradation of phenol: a mechanistic study
Source: Royal Society of Chemistry journal article supplement (doi:10.1039/d0nj03684f), 2020-01-01
Supplement: d0nj03684f1.pdf [file d0nj03684f1.pdf]

## **Supplementary Information**

# **Sulfonated polyaniline encapsulated graphene@graphitic carbon nitride nanocomposites for significantly enhanced photocatalytic degradation of phenol: A mechanistic study**

Asim Jilani<sup>1,2,3\*</sup>, Ghani ur Rehman<sup>2,3</sup>, Mohammad Omaish Ansari<sup>1,4\*\*</sup>, Mohammad Hafiz  
Othman<sup>2,3</sup>, Syed Zajif Hussain<sup>5</sup>, Mohsin Raza Dustgeer<sup>6</sup>, Reem Darwesh<sup>7</sup>

<sup>1</sup>*Center of Nanotechnology, King Abdulaziz University, Jeddah, 21589, Saudi Arabia*

<sup>2</sup>*Advanced Membrane Technology Research Centre, Universiti Teknologi Malaysia, 81310 UTM Johor Bahru,  
Johor, Malaysia*

<sup>3</sup>*School of Chemical and Energy Engineering, Faculty of Engineering, Universiti Teknologi Malaysia, 81310 UTM  
Johor Bahru, Johor, Malaysia*

<sup>4</sup>*School of Chemical Engineering, Yeungnam University, Gyeongsan-si, Gyeongbuk 712-749,  
South Korea*

<sup>5</sup>*Department of Chemistry and Chemical engineering, SBA School of Science & Engineering (SBASSE), Lahore  
University of Management Sciences (LUMS), Lahore - 54792, Pakistan*

<sup>6</sup>*Department of Environmental Sciences and Engineering, Government College University Faisalabad, Faisalabad,  
38000, Pakistan*

<sup>7</sup>*Physics Department, Faculty of Science, King Abdulaziz University, Jeddah, Saudi Arabia*

### **Correspondence**

#### **Mohammad Omaish Ansari**

Center of Nanotechnology, King Abdulaziz University, Jeddah - 21589, Saudi Arabia.

E-mail: omaishchem@gmail.com

#### **Asim Jilani**

Center of Nanotechnology, King Abdulaziz University, Jeddah - 21589, Saudi Arabia.

E-mail: asim.jilane@gmail.com

Structural analysis of Pure PANI

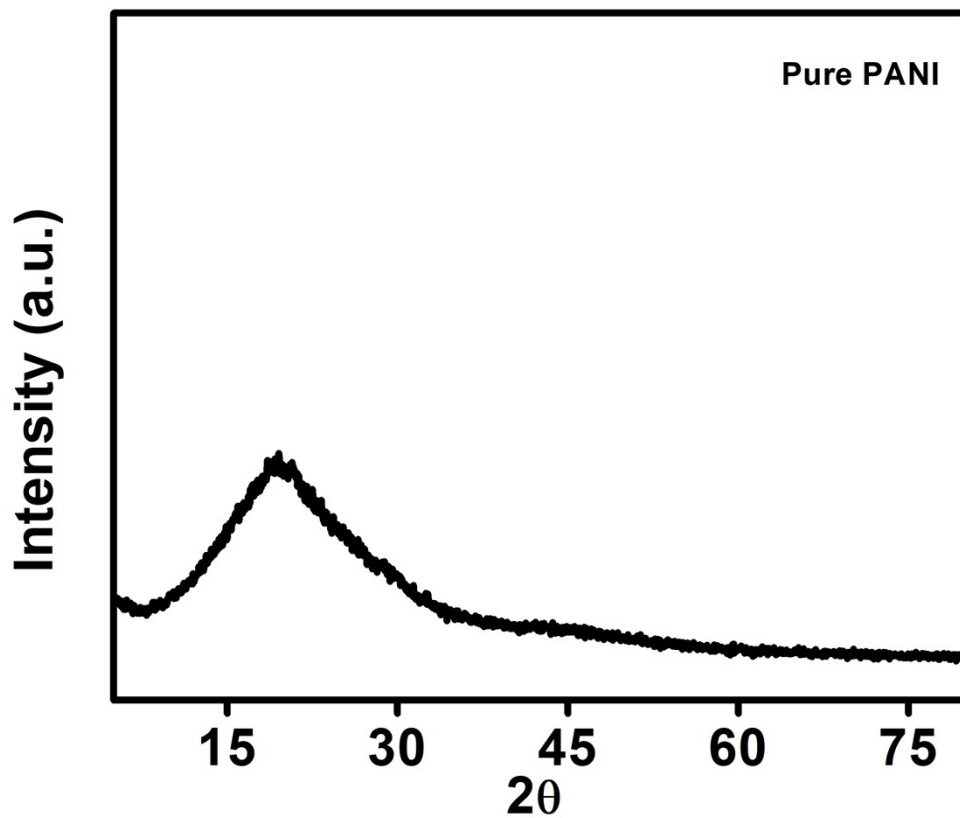

Fig. S1 X-ray diffraction pattern of Pure PANI

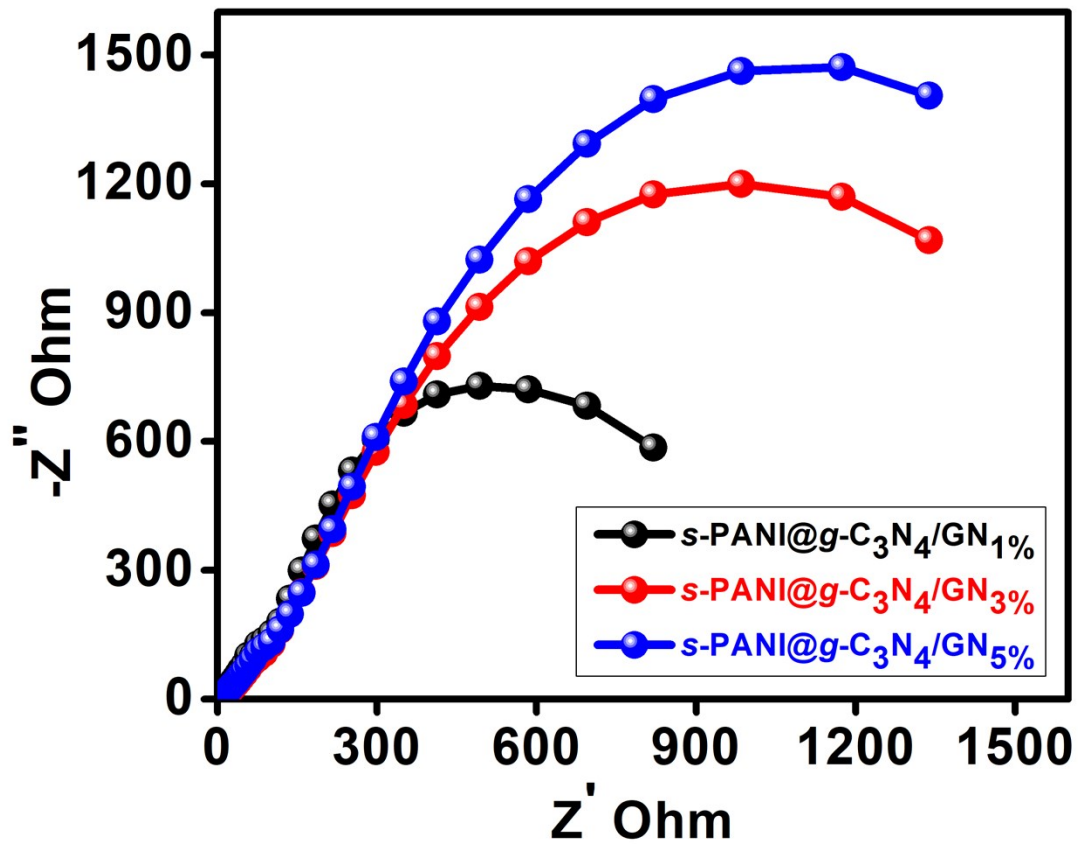

**Fig. S2:** EIS Analysis of *s*-PANI@g-C<sub>3</sub>N<sub>4</sub>/GN<sub>1</sub>%, *s*-PANI@g-C<sub>3</sub>N<sub>4</sub>/GN<sub>3</sub>%, and *s*-PANI@g-C<sub>3</sub>N<sub>4</sub>/GN<sub>5</sub>%

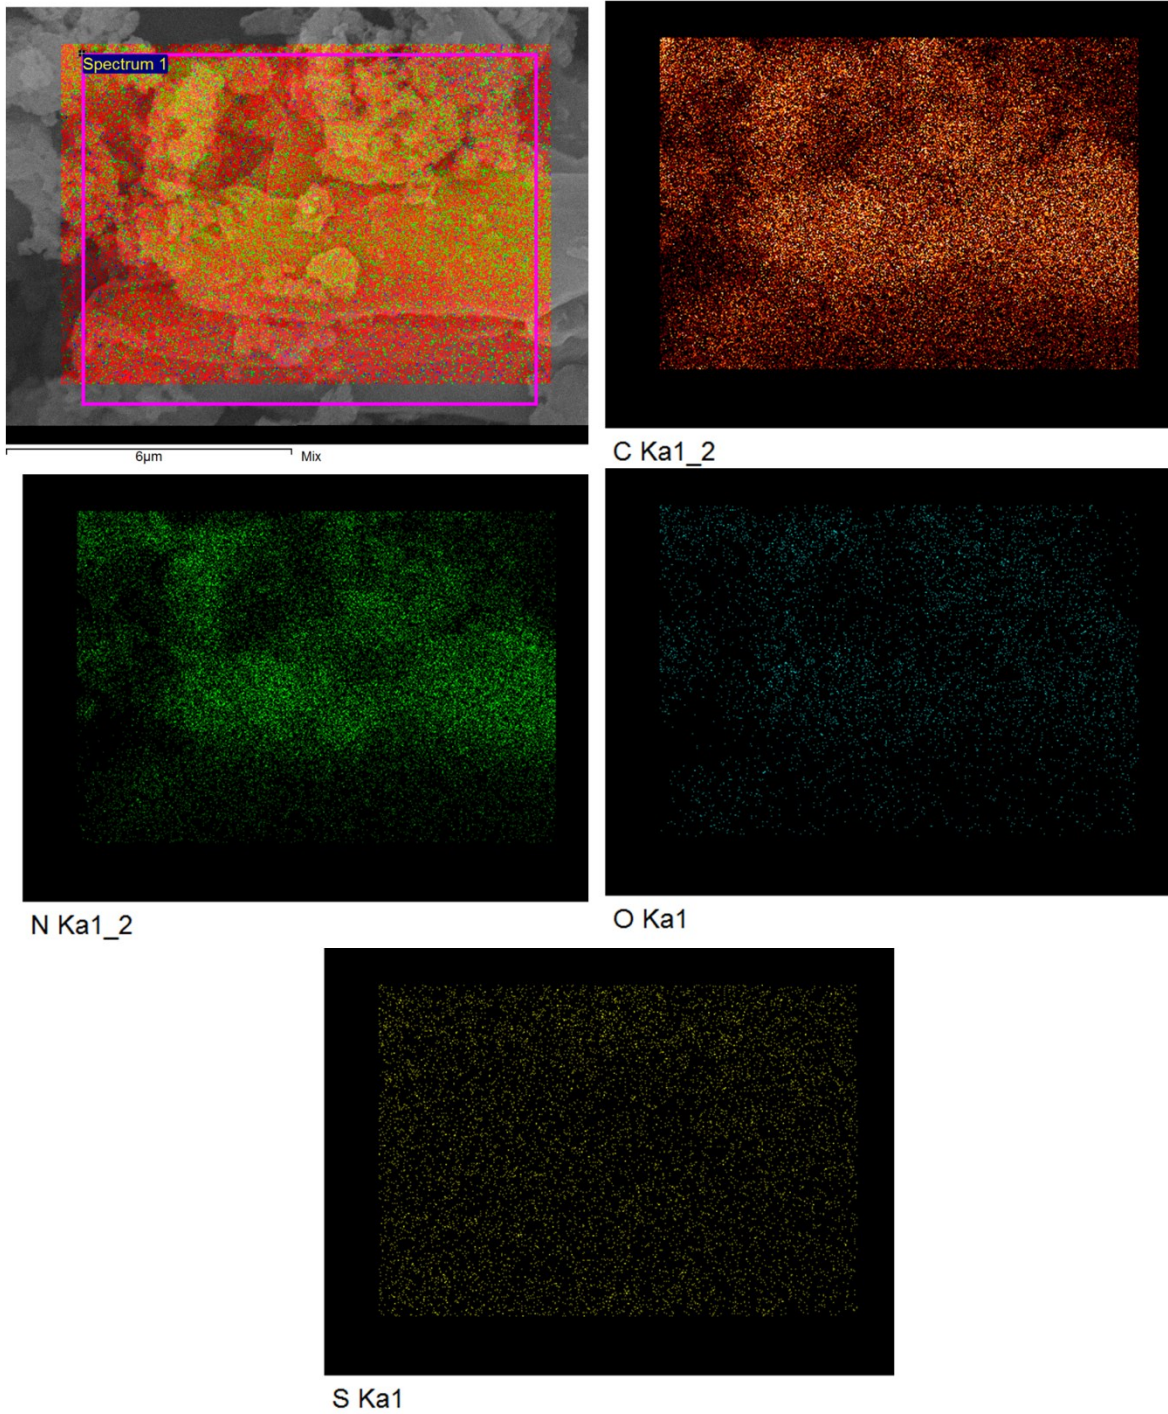

**Fig. S3** : EDS elemental mapping of *s*-PANI@g-C<sub>3</sub>N<sub>4</sub>/GN<sub>1%</sub>
